# Supplementary material for: Stress granules are dispensable for mRNA stabilization during cellular stress
Source: PubMed Central journal article supplement (PMC4344486; doi:10.1093/nar/gku1275), 2014-12-08
Supplement: supp_gku1275_nar-01907-y-2014-File008.pdf [file supp_gku1275_nar-01907-y-2014-File008.pdf]

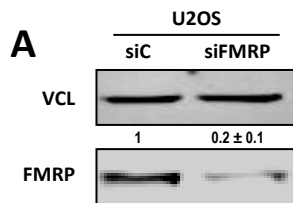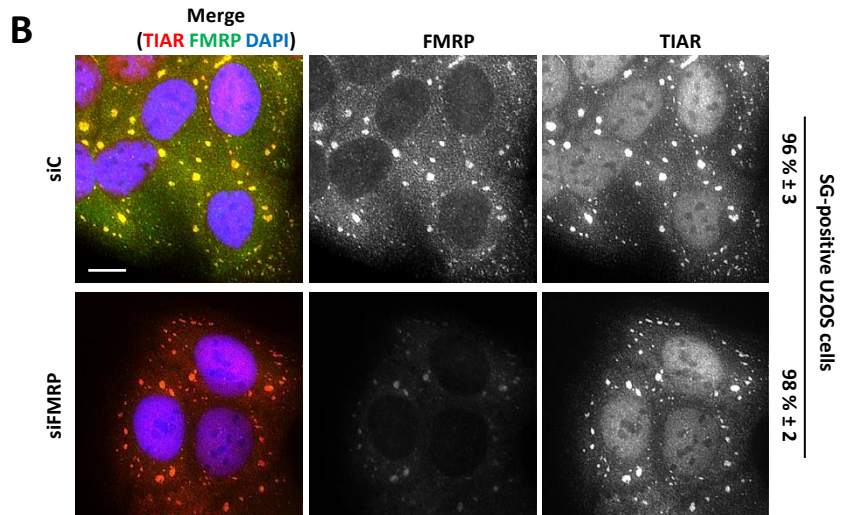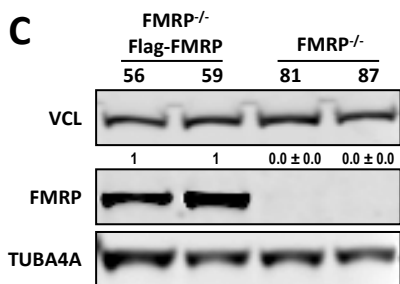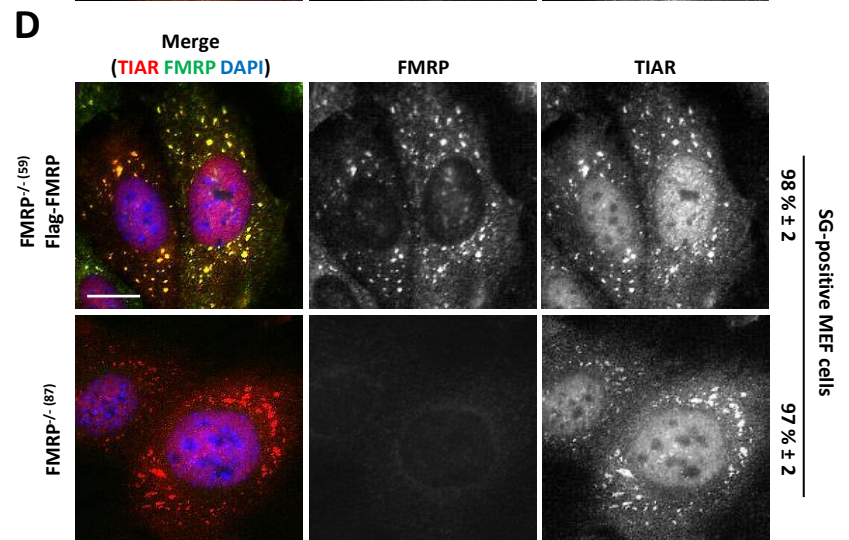

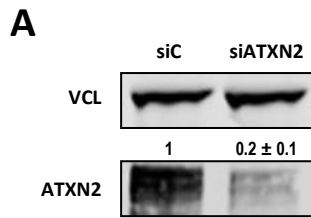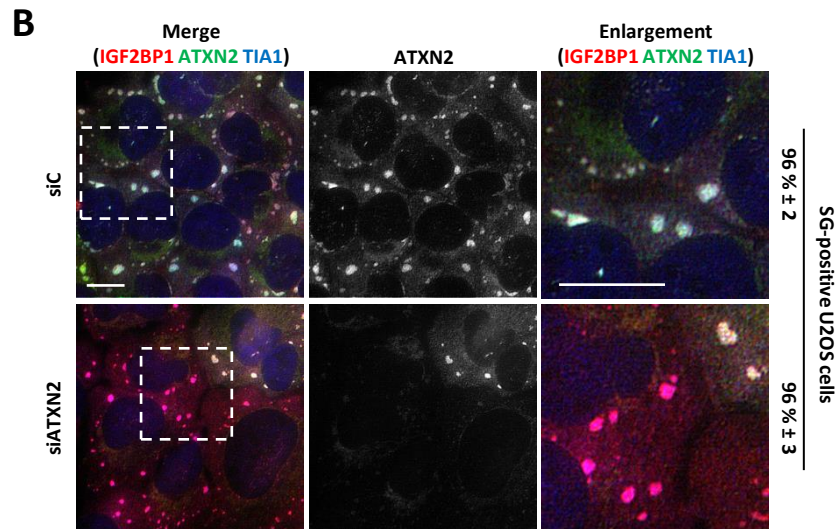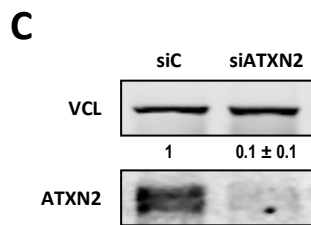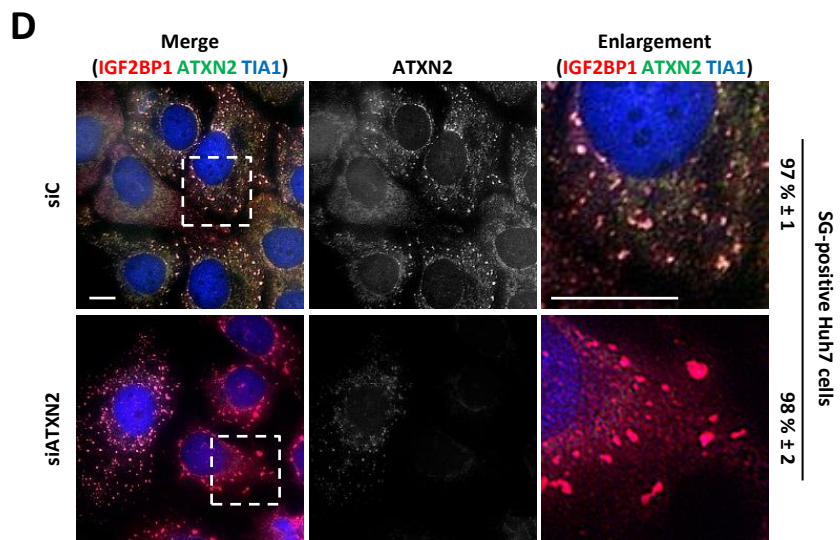

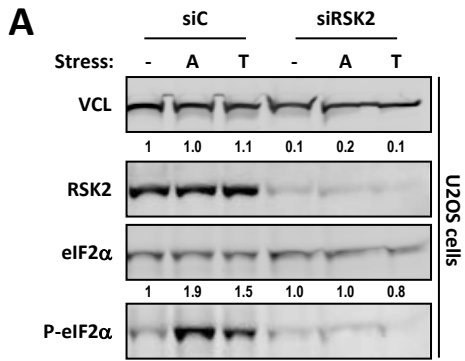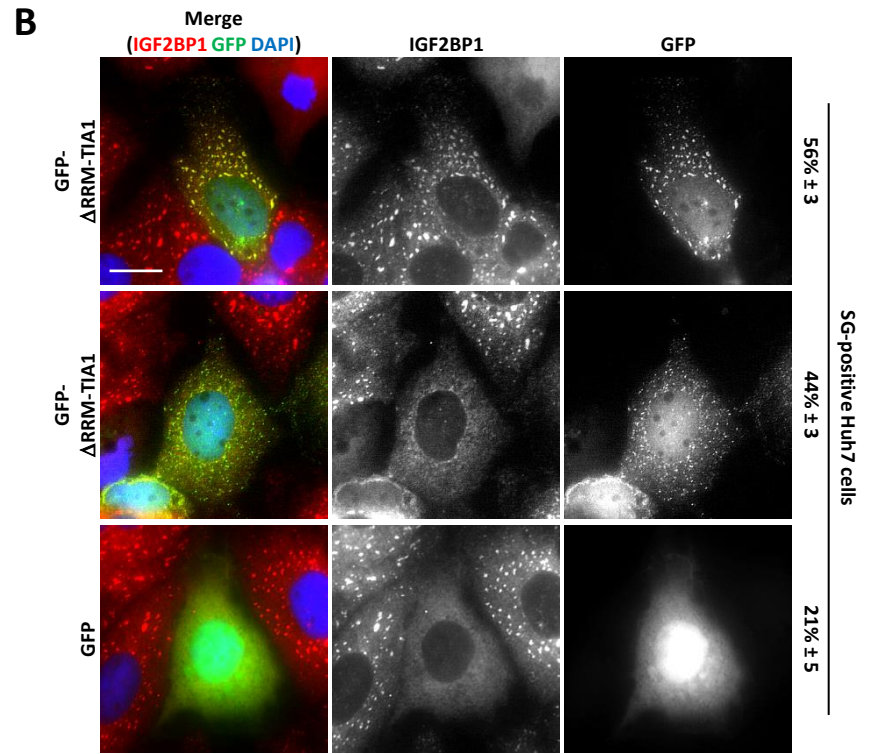

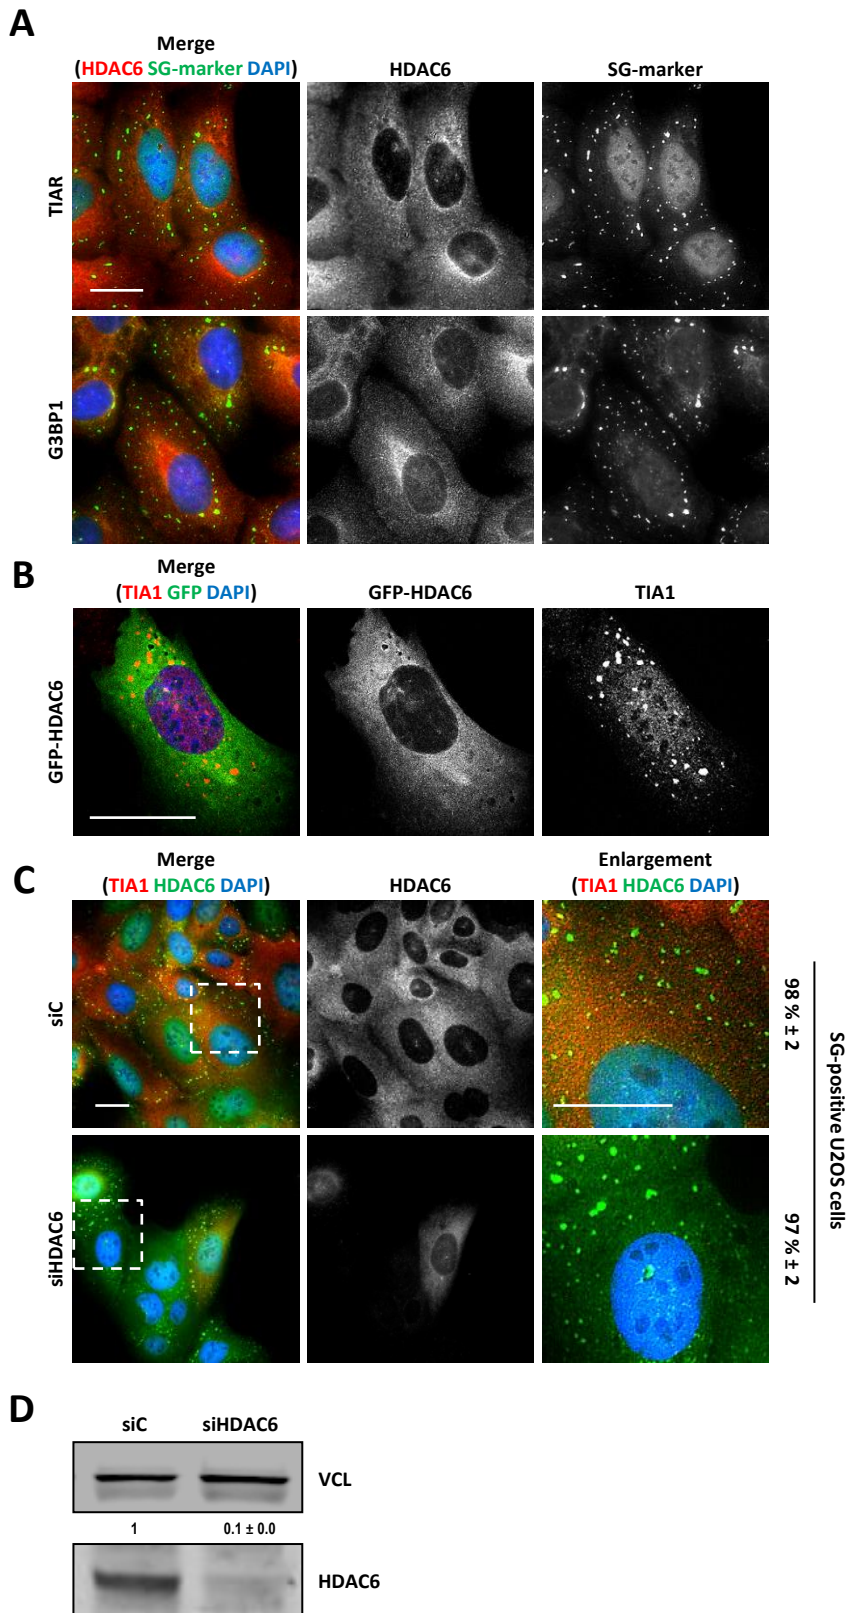

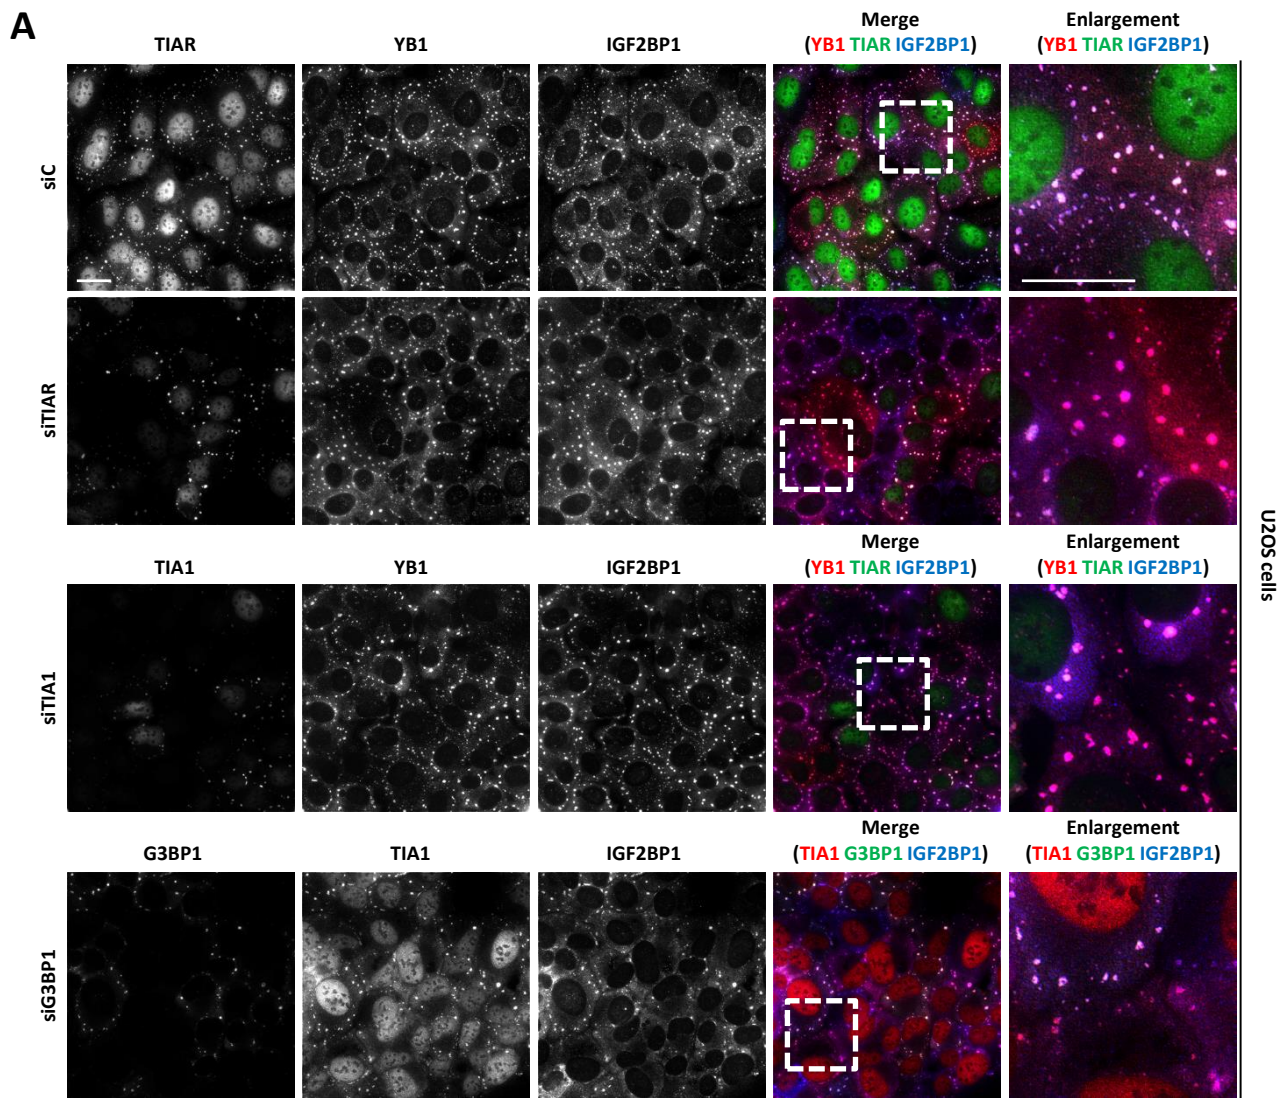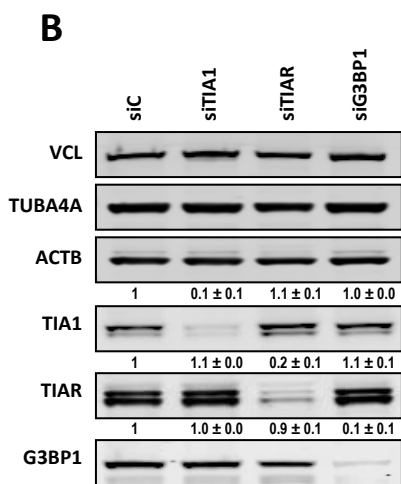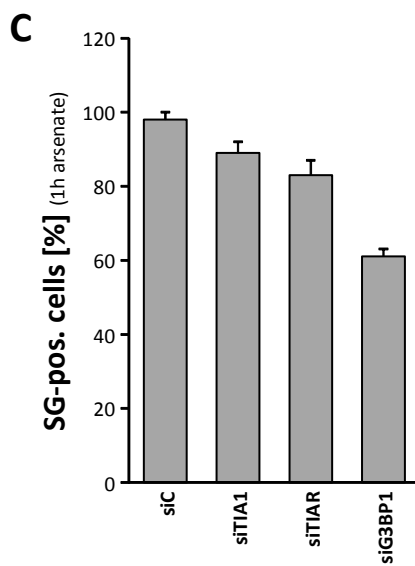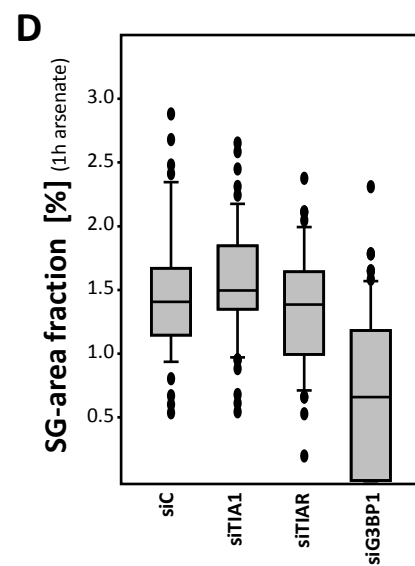

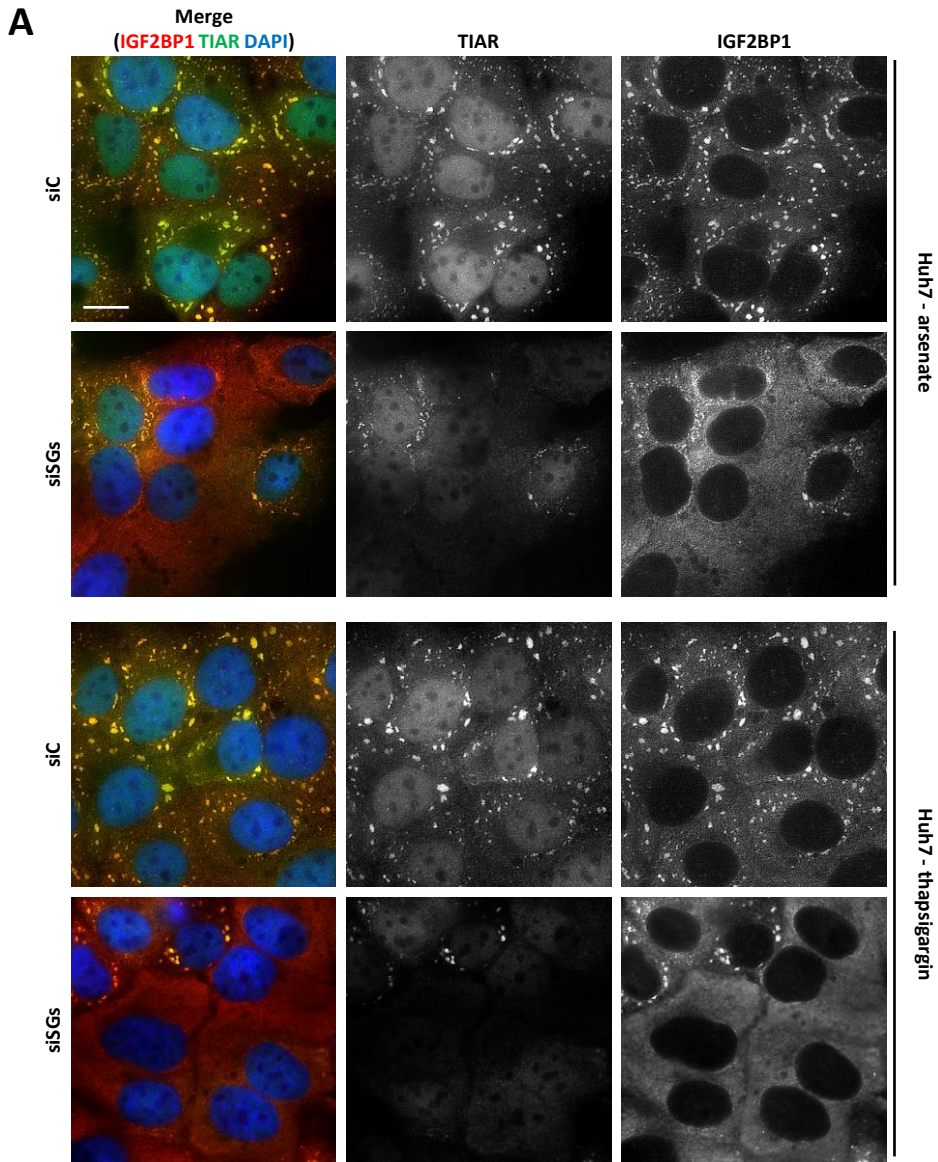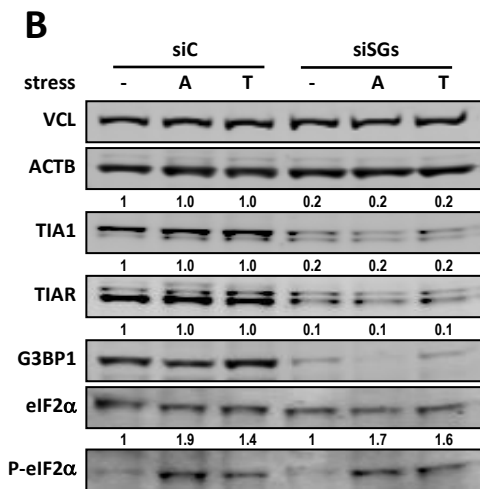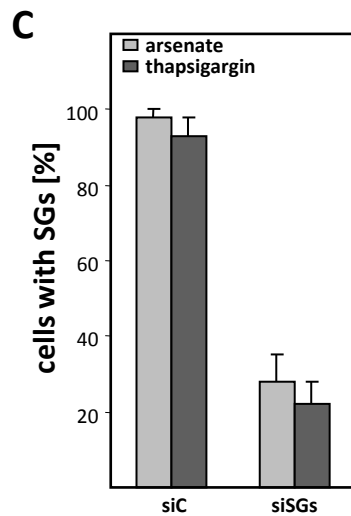

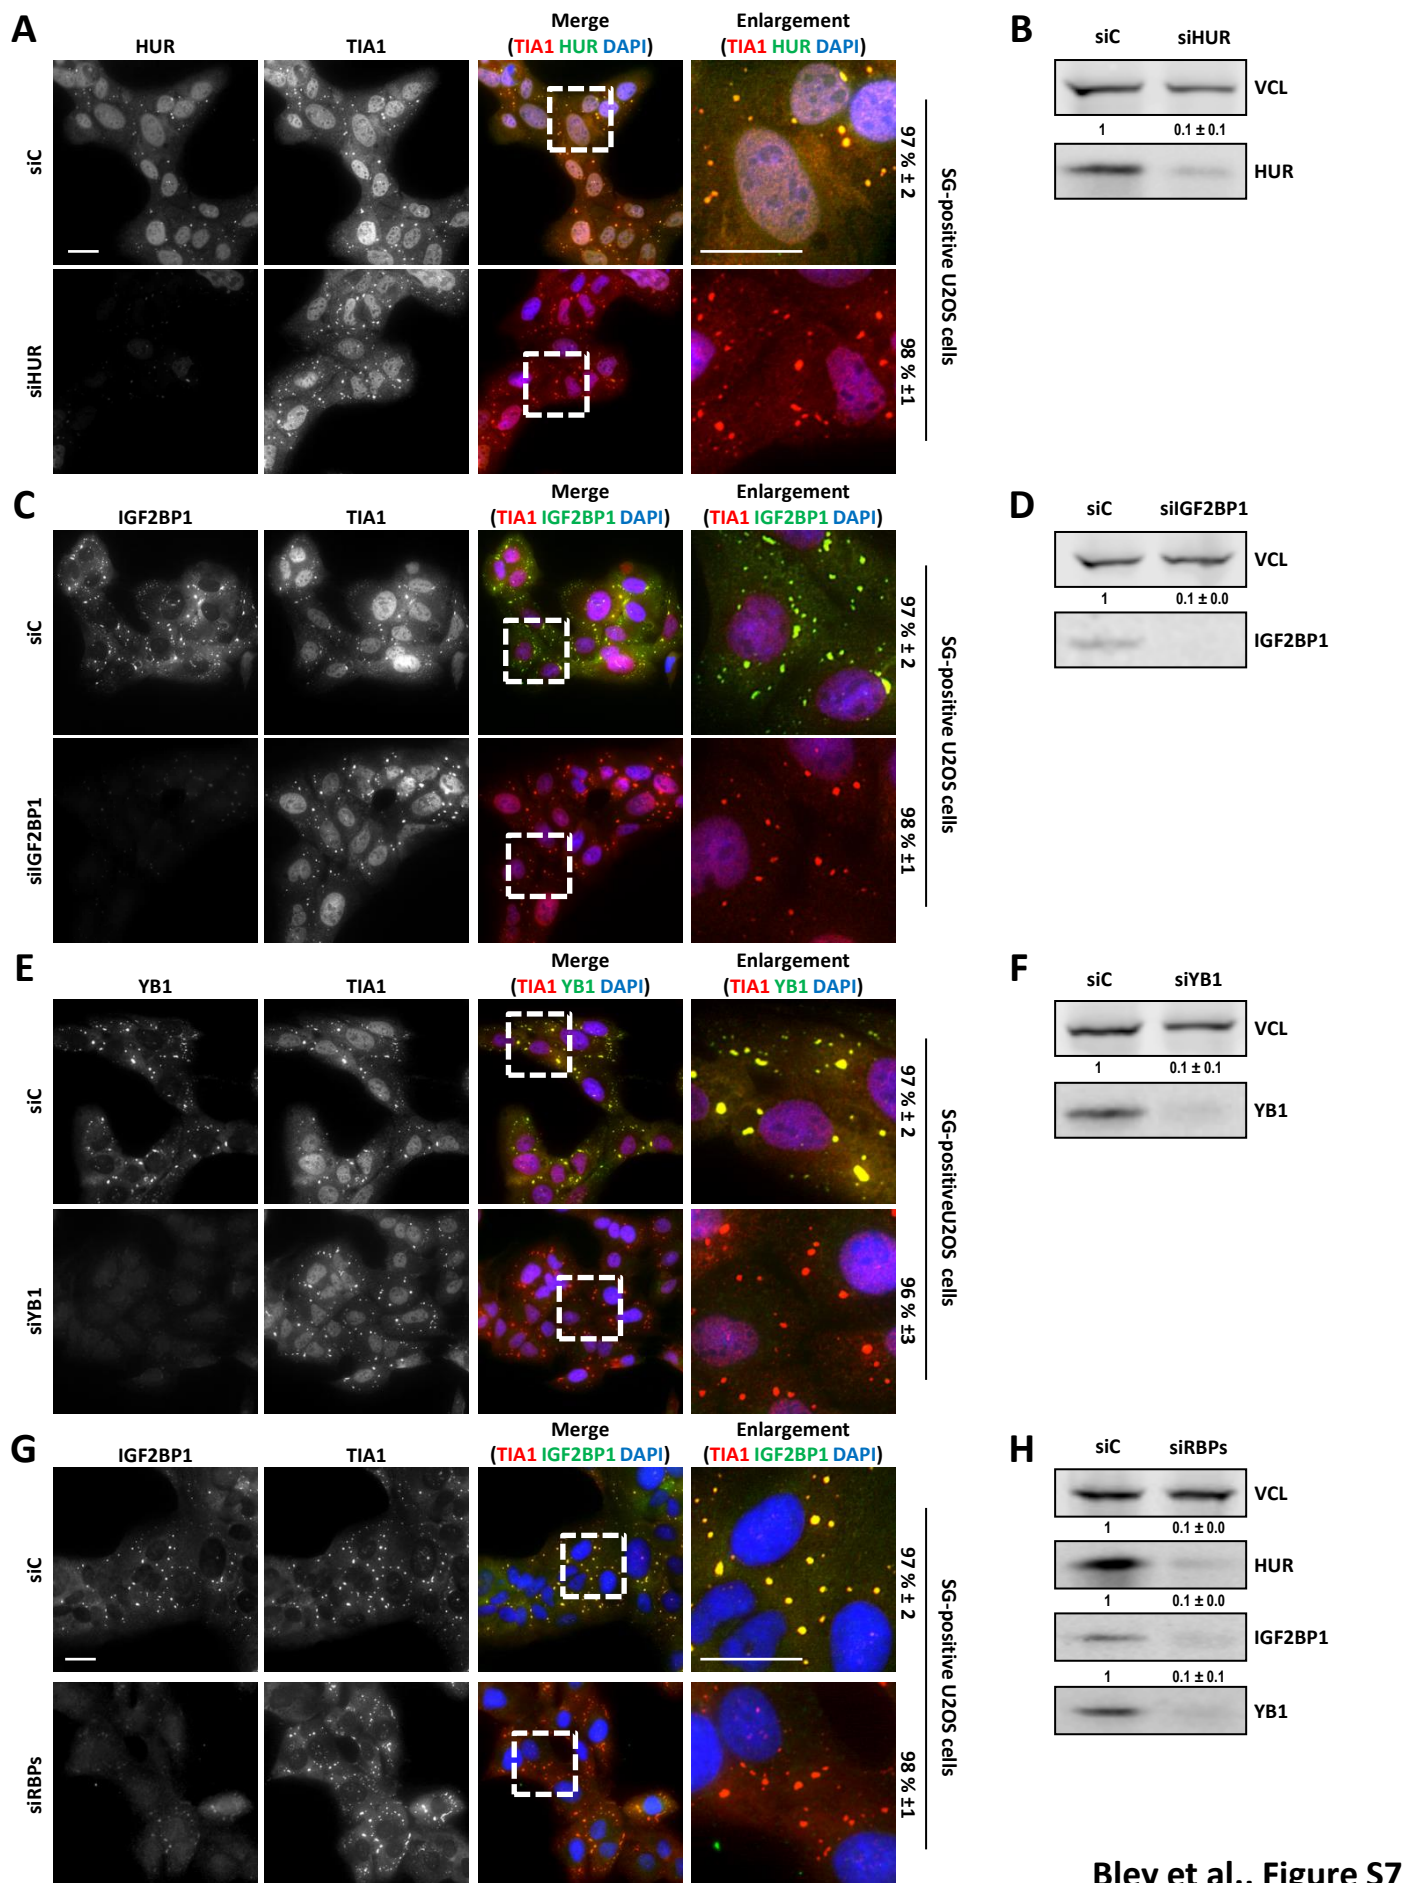

**A**

| protein | conditions         | $t_{1/2}$ [sec] |           | immobile fraction [%] |           | experiments |           |
|---------|--------------------|-----------------|-----------|-----------------------|-----------|-------------|-----------|
|         |                    | SGs             | cytoplasm | SGs                   | cytoplasm | SGs         | cytoplasm |
| G3BP1   | OE-induced         | 6,6             | 1,1       | 36,2                  | 15,2      | 10          | 10        |
|         | transient/arsenate | 3,4             |           | 30,6                  |           |             |           |
|         | stable/arsenate    | 3,5             | 1,8       | 21,7                  | 15,8      | 30          | 20        |
|         | all                | 3,5             | 1,6       | 23,7                  | 15,7      | 50          | 30        |
| TIA1    | transient/arsenate | 2,5             | 2,8       | 24,4                  | 26,2      | 10          | 5         |
| TIAR    | transient/arsenate | 2,2             | 3,0       | 24,9                  | 29,4      | 10          | 5         |
| ZBP1    | transient/arsenate | 13,6            | 1,9       | 71,4                  | 25,8      | 10          | 5         |
|         | stable/arsenate    | 15,8            | 2,0       | 72,5                  | 24,2      | 25          | 10        |
|         | all                | 14,8            | 2,0       | 72,3                  | 24,6      | 35          | 15        |
| IGF2BP1 | transient/arsenate | 19,5            | 5,8       | 71,7                  | 20,9      | 10          | 5         |
| HUR     | transient/arsenate | 17,7            | 9,3       | 57,0                  | 31,9      | 10          | 5         |
| YB1     | stable/arsenate    | 20,7            | 2,7       | 70,9                  | 29,7      | 10          | 5         |

**B**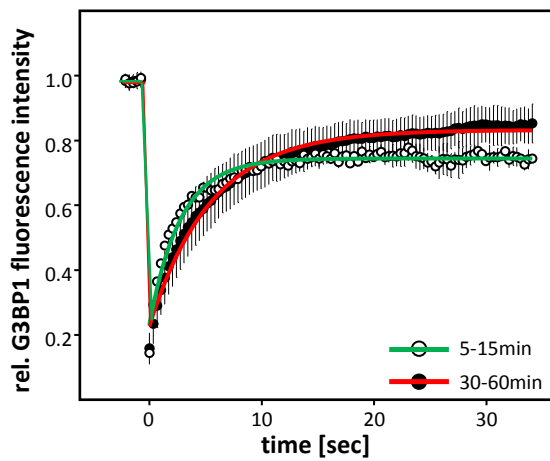**C**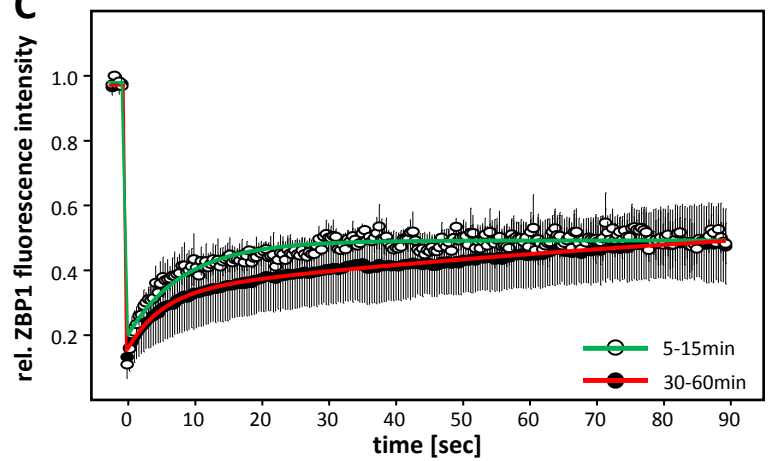**D**

| protein | arsenate | $t_{1/2}$ in [sec] | IF [%] |
|---------|----------|--------------------|--------|
| G3BP1   | 5-15min  | 1,3                | 33,3   |
|         | 30-60min | 1,8                | 21,7   |
| ZBP1    | 5-15min  | 7,6                | 63,2   |
|         | 30-60min | 13,8               | 66,9   |



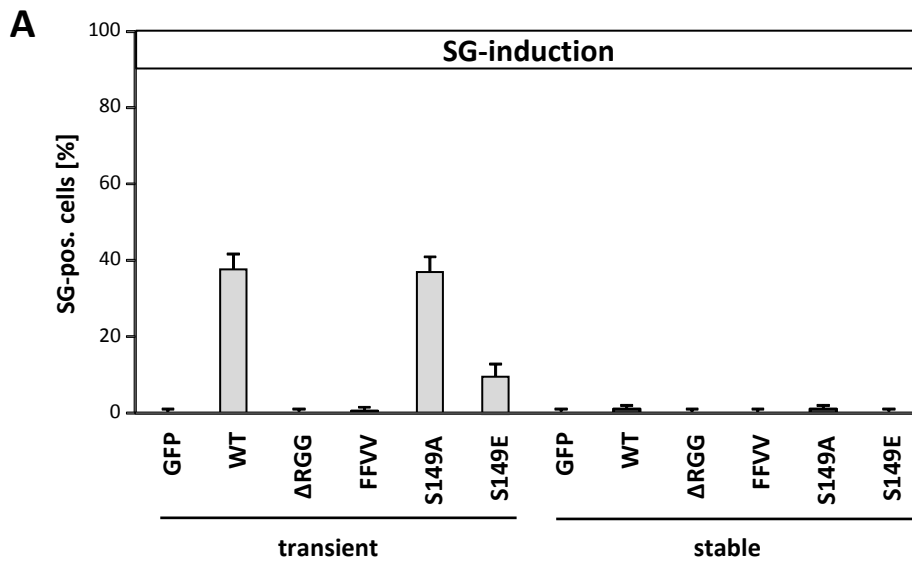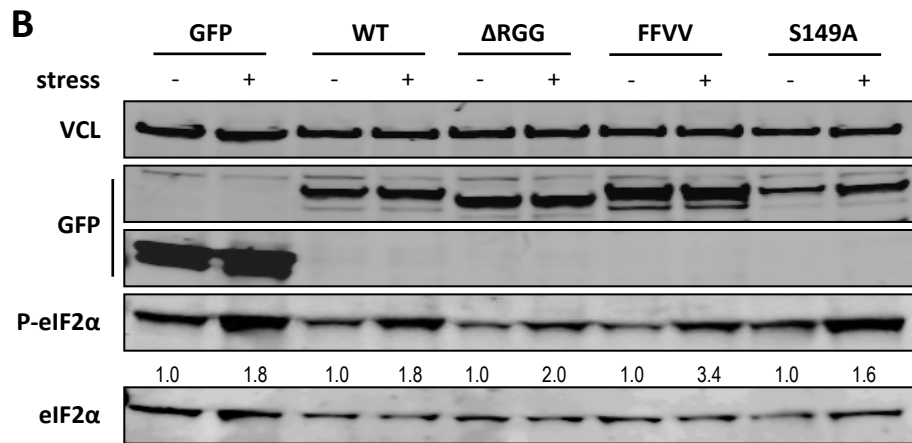

**A**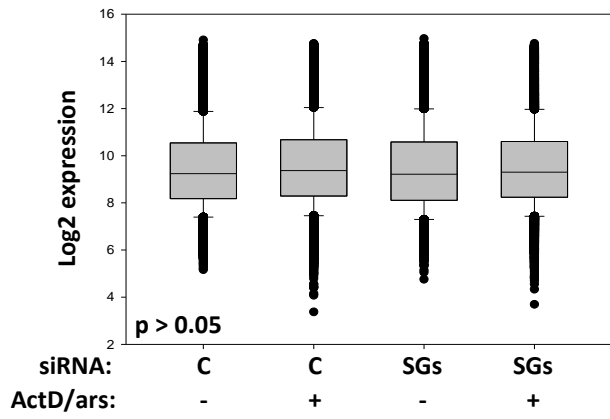**B**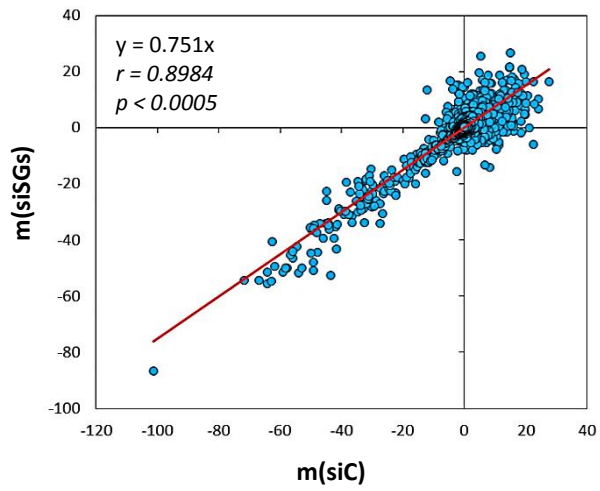

**Table S1: siRNAs, plasmids and oligonucleotides**

| <i>siRNAs</i>      | <i>sequence</i>                                                      |                                           |                                              |                                                |
|--------------------|----------------------------------------------------------------------|-------------------------------------------|----------------------------------------------|------------------------------------------------|
| siC (C.el.mir239b) | uuguacuacacaaaaguacug                                                |                                           |                                              |                                                |
| siIGF2BP1          | ugaauaggccaccaguugga                                                 |                                           |                                              |                                                |
| siYB1              | gcgaagguuccccuuacua                                                  |                                           |                                              |                                                |
| siHUR              | ggacaaaaucuuacagguu                                                  |                                           |                                              |                                                |
| siTIA1             | auucgagucuuuccagaua                                                  |                                           |                                              |                                                |
| siTIA1 (2)         | caggaaagucuaaggaua                                                   |                                           |                                              |                                                |
| siTIAR             | ugacagaaguccuuuauacu                                                 |                                           |                                              |                                                |
| siTIAR (2)         | gaaaggaggucaaaaguuaaa                                                |                                           |                                              |                                                |
| siG3BP1            | aaagccugagccaguuuaa                                                  |                                           |                                              |                                                |
| siG3BP1 (2)        | cauuaacagugguggaaaa                                                  |                                           |                                              |                                                |
| siRSK2             | ccaugaagguuuuugaaga                                                  |                                           |                                              |                                                |
| siHDAC6            | gguaaaagaaaggcaaaa                                                   |                                           |                                              |                                                |
| siATXN2            | uaugaggagguucauaua                                                   |                                           |                                              |                                                |
| <i>plasmids</i>    | <i>vector</i>                                                        | <i>sense</i>                              | <i>antisense</i>                             | <i>cloning</i>                                 |
| GFP-DRRM-TIA1      | pEGFP C2                                                             | aagaattcatgctcagacttttcacc                | ctcagtcactgggttcataccctgc                    | EcoRI/XhoI in Sall                             |
| GFP-HDAC6          | pEGFP C2                                                             | aaaga tct atgacctcaaccggcaggattccacc      | aaccgggttttcatttctctgtggcccg                 | BglII/Xma                                      |
|                    |                                                                      | aaccgggagctgcacgtgagattccaac              | aactagattagtgtgggtgggcatatcctccc             | Xma/XbaI                                       |
| GFP-G3BP1          | described in Stohr et al. 2006                                       | gggaattcatggtgatggagaagcctagtc            | gggtcgacttactgcggtggcgaagcccccttc            | EcoRI/Sall                                     |
| GFP-G3BP1          | pLVX-puro-GFP                                                        | gcacgaattcatggtgatggagaagcctagctccctgctgg | tggcgtgactcactgcggtggcgaagcccccttcccac       | EcoRI/Sall                                     |
| GFP-G3BP1-DRGG     | pLVX-puro-GFP                                                        | gcacgaattcatggtgatggagaagcctagctccctgctgg | ggcgtcgactcaactcgtcggctccttccctggcagctcg     | EcoRI/Sall                                     |
| GFP-G3BP1-FVIV     | pLVX-puro-GFP                                                        | ggcgtcgactcaactcgtcggctccttccctggcagctcg  | tcagaatcatcaaacacaacacacacacattgggtaattcccac | mutagenesis                                    |
| GFP-G3BP1-S149A    | pLVX-puro-GFP                                                        | gagcctcagaggagctgaagaagaagtagagg          | ccttacttcttctcagcctcctcctgagcctc             | mutagenesis                                    |
| GFP-G3BP1-S149E    | pLVX-puro-GFP                                                        | gagcctcagaggaggaagaagaagtagagg            | ccttacttcttcttctcctcctcctgagcctc             | mutagenesis                                    |
| shATXN2            | pSuper                                                               |                                           |                                              |                                                |
| GFP-YB1            | pEGFP C2, Clontech                                                   |                                           |                                              | subcloned from pcDNA3.1 via EcoRI/XhoI in Sall |
| GFP-HUR            | pEGFP C2, Clontech                                                   |                                           |                                              | subcloned from pcDNA3.1 via EcoRI/XhoI in Sall |
| GFP-ZBP1           | described in Stohr et al. 2006                                       |                                           |                                              |                                                |
| YFP-TIA1           | kind gift from R.H. Singer, Albert-Einstein College of Medicine, NYC |                                           |                                              |                                                |
| GFP-TIAR           | pEGFP C2, Clontech                                                   | gggaattcatgaggaagcagcgggcagc              | ggctcgactcactgtgttggtaactgccatc              | EcoRI/XhoI in Sall                             |
| Dendra-ZBP1        | pDendra2-C, Clontech, modified MCS                                   |                                           |                                              | subcloned from pcDNA3.1 via EcoRI/XhoI         |
| Dendra-G3BP1       | pDendra2-C, Clontech, modified MCS                                   |                                           |                                              | subcloned from pcDNA3.1 via EcoRI/XhoI in Sall |
| <i>qRT-PCR</i>     | <i>sense</i>                                                         | <i>Antisense</i>                          |                                              |                                                |
| HSP90AA            | ggctcctgtcggctcacttag                                                | aaaggcgaactctcaacc                        |                                              |                                                |
| HSPAA/B1           | caagatcaccatcaccaacg                                                 | tcgtcctcgccttctactt                       |                                              |                                                |
| HSPA2              | caagatcaccatcaccaacg                                                 | cgctcctcgccttctactt                       |                                              |                                                |
| MAPK4              | tgctcaagattgggatttc                                                  | gatgagttgcatctgctcca                      |                                              |                                                |
| MYC                | agcgactctgaggaggaac                                                  | cgtagttgtctgatgtgtg                       |                                              |                                                |
| ACTB               | agaaaactctggcaccacacc                                                | agaggcgtacaggatagca                       |                                              |                                                |
| PPIA               | gtcaacccaccgttctt                                                    | ctgctgtctttggaccttgt                      |                                              |                                                |
| RPLP0              | ggcgacctggaagtccaact                                                 | ccatcagcaccacagccttc                      |                                              |                                                |
| VCL                | ttacagtgccagaggtggtg                                                 | tcacggttctatcgagttc                       |                                              |                                                |

Bley et al., Table S1

**Table S2: antibodies**

| <i>antibodies</i>        | <i>Company</i>           | <i>Clone number</i> |
|--------------------------|--------------------------|---------------------|
| anti-IGF2BP1             | Stohr et al., 2012       | mouse monoclonal    |
| anti-IGF2BP1             | Huttelmaier et al., 2005 | rabbit polyclonal   |
| anti-YB1                 | Santa Cruz               | 59-Q                |
| anti-HUR                 | Santa Cruz               | sc-5261             |
| anti-TIAR                | BD Transductions         | 610352              |
| anti-TIA1                | Santa Cruz               | N-17                |
| anti-G3BP1               | Santa Cruz               | H-10                |
| anti-eIF2a               | Cell Signaling           | 9722                |
| anti-phospho-eIF2a (S51) | Cell Signaling           | L57A5               |
| anti-RSK2                | Cell Signaling           | 9340                |
| anti-FMRP                | Abcam                    | ab27455             |
| anti-HDAC6               | Santa Cruz               | H-300               |
| anti-ATXN2               | BD Transductions         | 611378              |
| anti-GFP                 | Santa Cruz               | B-2                 |

Bley et al., Table S2
